# Supplementary material for: Two years’ experience of implementing a comprehensive telemedical stroke network comprising in mainly rural region: the Transregional Network for Stroke Intervention with Telemedicine (TRANSIT-Stroke)
Source: Springer Nature journal article supplement (doi:10.1186/s12883-020-01676-6), 2020-03-19
Supplement: MOESM1 [file 17815856]

Additional file 1: Definitions of the German quality indicators in acute stroke care as defined by the Quality Indicator Board of the German Stroke Registers Study Group.

|                                | Brief description                                                                                                                                                                                                                                                                                                                                                                                                                                                                                | target value (2016) |
|--------------------------------|--------------------------------------------------------------------------------------------------------------------------------------------------------------------------------------------------------------------------------------------------------------------------------------------------------------------------------------------------------------------------------------------------------------------------------------------------------------------------------------------------|---------------------|
| brain imaging                  | <b>Early cerebral imaging (&lt; 60 min after admission) in patients eligible for thrombolysis</b><br>Numerator: Patients with cerebral imaging (CCT/MRI) within the first hour of admission.<br>Denominator: All patients within the age range 18-80 and with onset-admission ≤ 2 h and NIHSS of 4-25.                                                                                                                                                                                           | 70 %                |
| door-to-needle-time (DTNT)     | <b>Door-to-needle-time &lt; 60 min in patients with IVT</b><br>Numerator: Patients with door-to-needle time <60 minutes.<br>Denominator: Patients with cerebral infarction and IVT.                                                                                                                                                                                                                                                                                                              | 90 %                |
| intravenous thrombolysis (IVT) | <b>Early intravenous thrombolysis (IVT) given in patients with indication for IVT</b><br>Numerator: Patients that received intravenous thrombolysis (IVT).<br>Denominator: Patients with cerebral infarction, age 18-80 and with onset-admission ≤ 2 h and NIHSS 4-25. Patients with intra-arterial thrombolysis are excluded.                                                                                                                                                                   | 35 %                |
| platelet inhibitor ≤ 48 h      | <b>Platelet inhibitor given within 48 h in patients with IS or TIA</b><br>Numerator: All patients that were given platelet inhibition within 48h after onset.<br>Denominator: Denominator: All patients with TIA and cerebral infarction. Patients that receive anticoagulation or where onset to admission is >48h are excluded as well as those aged <18 and those discharged, transferred or died on the first day.                                                                           | 95 %                |
| dysphagia screening            | <b>Dysphagia screening</b><br>Numerator: Patients with dysphagia screening per protocol.<br>Denominator: All patients with stroke. Patients with TIA, impaired consciousness, or those where dysphagia screening was not possible or those that were discharged/transferred or died on the day of admission are excluded.                                                                                                                                                                        | 90 %                |
| speech therapy                 | <b>Early speech and language therapy for patients with dysphagia / dysphasia / dysarthria</b><br>Numerator: Patients that received treatment by speech and language therapy within the first 2 days.<br>Denominator: All patients with dysphasia/dysarthria/dysphagia. Patients with TIA, those unconscious and those that were discharged, transferred or died on the first day are excluded.                                                                                                   | 90 %                |
| physiotherapy                  | <b>Early physio- /occupational therapy for patients with motor disability</b><br>Numerator: Patients that received treatment by physiotherapy or occupational therapy within the first two days.<br>Denominator: All patients with a paresis and clear functional deficit (modified Rankin Scale (mRS) ≥ 3 or Barthel Index ≤ 70 within the first 24 h after admission). Patients with TIA, those unconscious and those that were discharged, transferred or died on the first day are excluded. | 90 %                |
| mobilisation                   | <b>Early mobilisation of patients with severe disability</b><br>Numerator: Patients that were mobilized within the first two days after admission.<br>Denominator: Patients that needed help with transfer from bed to chair (Barthel Index 0-10). Patients that were discharged, transferred or died on the first day, those with TIA and those unconscious, with mechanical ventilation or with increased intracranial pressure on admission are excluded.                                     | 90 %                |
| atrial fibrillation screening  | <b>Patients receiving an atrial fibrillation screening during their stay</b><br>Numerator: Patients with an atrial fibrillation<br>Denominator: All patients with IS or TIA. Patients with known atrial fibrillation are excluded.                                                                                                                                                                                                                                                               | 80 %                |

Additional file 1: Definitions of the German quality indicators in acute stroke care as defined by the Quality Indicator Board of the German Stroke Registers Study Group.

|                                  | Brief description                                                                                                                                                                                                                                                                                                                                                                                                                                       | target value (2016) |
|----------------------------------|---------------------------------------------------------------------------------------------------------------------------------------------------------------------------------------------------------------------------------------------------------------------------------------------------------------------------------------------------------------------------------------------------------------------------------------------------------|---------------------|
| vascular imaging                 | <p><b>Extracranial carotid artery diagnostic in patients with IS or TIA</b><br/>                     Numerator: Patients with imaging of extracranial vessels (doppler sonography / duplex sonography / DSA / CT-angiography / MR-angiography).<br/>                     Denominator: All patients with TIA or cerebral infarction.</p>                                                                                                                 | 80 %                |
| revascularisation                | <p><b>Revascularisation of symptomatic carotid stenosis in patients with IS or TIA</b><br/>                     Numerator: Patients where revascularization of carotid artery was initiated or recommended.<br/>                     Denominator: Patients with TIA or cerebral infarction with ipsilateral stenosis of carotid artery (70% - 99% NASCET) and with mRS 0-3. Patients with a mechanical recanalization are excluded.</p>                 | 60 %                |
| antihypertensive drugs           | <p><b>Antihypertensive drugs at discharge in patients with IS or TIA</b><br/>                     Numerator: Patients with indication for antihypertensive therapy that receive antihypertensive at discharge.<br/>                     Denominator: All patients with IS or TIA and hypertension as co-morbidity. Patients who died are excluded.</p>                                                                                                  | 95 %                |
| statins                          | <p><b>Patients receiving statin at discharge or whom a statin was recommended</b><br/>                     Numerator: Patients that receive statins at discharge.<br/>                     Denominator: All patients with IS or TIA. Patients who died are excluded.</p>                                                                                                                                                                                | 80 %                |
| platelet inhibitors at discharge | <p><b>Platelet inhibitor given at discharge in patients with IS or TIA and no anticoagulation</b><br/>                     Numerator: All patients that receive platelet inhibition at discharge/transfer.<br/>                     Denominator: All patients with TIA or cerebral infarction. Patients on anticoagulation and those who died are excluded as well as those aged &lt;18 and those discharged, transferred or died on the first day.</p> | 95 %                |
| rehabilitation                   | <p><b>Discharge in rehabilitation clinic</b><br/>                     Numerator: Patients where post hospital rehabilitation was initiated.<br/>                     Denominator: All patients without previous nursing care with mRS 2-5 at discharge. Patients that were transferred or died during the hospital stay are excluded.</p>                                                                                                               | 70 %                |
